1  
2  
3  
4  
5  
6  
7  
8  
9  
10  
11  
12  
13  
14  
15  
16  
17  
18  
19  
20  
21  
22  
23

**Expanding gene families helps generate the metabolic robustness required for antibiotic biosynthesis**

**Jana K Schniete<sup>1</sup>, Pablo Cruz-Morales<sup>2</sup>, Nelly Selem<sup>2</sup>, Lorena T. Fernández-Martínez<sup>3</sup>, Iain S Hunter<sup>1</sup>, Francisco Barona-Gómez<sup>2</sup>, Paul A Hoskisson<sup>1\*</sup>**

Affiliations:

<sup>1</sup> Strathclyde Institute of Pharmacy and Biomedical Sciences, University of Strathclyde, 161 Cathedral Street, Glasgow, G4 0RE, United Kingdom

<sup>2</sup> Evolution of Metabolic Diversity Laboratory, Langebio, Cinvestav-IPN, Libramiento Norte Carretera Leon Km 9.6, 36821, Irapuato, Guanajuato, México.

<sup>3</sup>Department of Biology, Edgehill University, St Helens Road, Ormskirk, Lancashire, L39 4QP, UK.

**\*Corresponding Author:** <sup>1</sup>Strathclyde Institute of Pharmacy and Biomedical Sciences, University of Strathclyde, 161 Cathedral Street, Glasgow, G4 0RE, United Kingdom, Tel.: +44 (0)141 548 2819; Fax: +44 (0)141 548 4124; E-mail: [Paul.hoskisson@strath.ac.uk](mailto:Paul.hoskisson@strath.ac.uk)

24 **Introductory paragraph**

25 Expanding the genetic repertoire of an organism by gene duplication or horizontal gene  
26 transfer (HGT) can aid adaptation. *Streptomyces* species are prolific producers of bioactive  
27 specialised metabolites with adaptive functions in nature and some have found utility in human  
28 medicine such as antibiotics. Whilst the biosynthesis of these specialised metabolites is  
29 directed by dedicated biosynthetic gene clusters (BGCs), little attention has been focussed on  
30 how these organisms have evolved robustness into their genomes to facilitate the metabolic  
31 plasticity required to provide chemical precursors for biosynthesis. Here we show that specific  
32 expansions of gene families in central carbon metabolism have evolved and become fixed in  
33 *Streptomyces* bacteria to enable plasticity and robustness that maintain cell functionality whilst  
34 costly specialised metabolites are produced. These expanded gene families, in addition to  
35 being a metabolic adaptation, make excellent targets for metabolic engineering of industrial  
36 specialised metabolite producing bacteria.

37

## 38 Introduction

39 A remarkable feature of specialised metabolite producing Actinobacterial genomes is the  
40 annotation of multiple genes that encode the same putative biochemical function<sup>1,2</sup>. This  
41 expansion of gene families by gene duplication or HGT is thought to introduce robustness into  
42 biological systems, which in turn facilitates evolvability and adaptation<sup>3-5</sup>. The expansion of  
43 gene families results in relaxed selection following the gene duplication or HGT event, that  
44 allows the accumulation of mutations which enable diversification of function to occur<sup>6</sup>. This  
45 suggests that gene family expansion within genomes is a key driver of biological innovation  
46 by facilitating adaptation<sup>7</sup>. The production of extensive specialised metabolites by certain  
47 Actinobacterial lineages is thought to be a key adaptive response to life in complex, highly  
48 competitive environments such as soil<sup>8-10</sup> and, as such, may drive the expansion of primary  
49 metabolic capability providing the metabolic robustness that facilitates the evolution of novel  
50 biosynthetic functions.

51 Surprisingly many central metabolic enzymes are non-essential for survival due to genetic  
52 redundancy through the presence of isoenzymes or alternative reactions. The redundancy  
53 allows cells to adapt to a variety of habitats and dynamic environmental conditions through  
54 provision of metabolic plasticity<sup>11</sup>. Whilst this has been studied in the unicellular enteric  
55 bacterium *Escherichia coli* and the yeast *Saccharomyces cerevisiae*<sup>12</sup>, little attention has been  
56 paid to organisms with extensive specialised metabolism. Gene families of Actinobacterial  
57 developmental genes have been studied at the genetic level<sup>7,13,14</sup> but little attention has been  
58 paid to either primary or specialised metabolism<sup>15</sup> and how the supply of biosynthetic  
59 precursors is maintained during the adaptive response under challenging environmental  
60 conditions.

61 In Actinobacteria, production of specialised metabolites is frequently growth phase dependent  
62 and usually in response to nutrient starvation and during entry into sporulation<sup>16</sup>. This creates  
63 a potential metabolic conflict for an organism, where declining availability of metabolites may  
64 constrain certain cellular process in favour of others, such as reducing cellular pools of  
65 metabolites that are used directly for specialised metabolites. Under these conditions it is likely  
66 that genetic redundancy can promote robustness and plasticity that helps to maintain cellular  
67 function in the face of perturbation<sup>17,18</sup>.

68 Here we systematically examine the genetic redundancy within the genomes of specialised  
69 metabolite producing Actinobacteria to understand how genetic robustness enables the  
70 evolution of extensive specialized metabolism. Moreover, a detailed functional analysis of a  
71 redundant pyruvate kinase gene pair from *Streptomyces coelicolor* A3(2) indicates that  
72 biochemical diversification at the enzyme level facilitates the evolution of distinct physiological

73 roles which enables functionality during the metabolic reprogramming that is associated with  
74 physiological differentiation.

75

76

## 77 Results

### 78 Gene expansion events are overrepresented in specialised metabolite producing 79 Actinobacteria

80 To determine if gene expansion events in central metabolism occur with greater frequency in  
81 specialised metabolite producing organisms, a database of 614 Actinobacterial genomes  
82 spanning 80 genera was compiled. All genomes were retrieved from GenBank, and re-  
83 annotated with RAST<sup>19</sup> to ensure consistency of annotation across the database and were  
84 then analysed in a bespoke bioinformatics pipeline based on EvoMining<sup>20</sup> (Supplementary Fig.  
85 S1). It was hypothesised that, if precursor supplying pathways are a contributing factor to the  
86 adaptive response of specialised metabolite production, then the enzymatic nodes  
87 contributing to precursor supply should be overrepresented in the database (Table 1 and  
88 Supplementary Table S1).

89 Expansion events were defined as cases where the number of enzyme family members per  
90 suborder had a value equal or higher than the mean number of members per phylum plus its  
91 standard deviation. The glycolytic pathway showed highest number of gene expansion events,  
92 in the Streptomycineae and Catenulisporineae with 23.3% and 25.0% more genes encoding  
93 glycolytic function than was average for that pathway in the phylum Actinobacteria respectively  
94 (Table 1). Pseudonocardineae showed highest number of gene expansions in  
95 gluconeogenesis (25% higher than the mean phylum value) and in the TCA cycle (28.3%  
96 higher than the mean phylum value). This was also true for many amino acid biosynthetic  
97 pathways. Where the main precursor is derived from 2-oxo-glutarate (Glu, Gln, Pro, Arg),  
98 expansion was 20.1% more than the mean suborder value, with pyruvate derived amino acids  
99 (Ala, Ile, Leu, Val; 31.3%), oxaloacetate derived amino acids (Asp, Asn, Thr, Met, Lys; 20.7%),  
100 3-PGA derived amino acids (Gly, Ser, Cys; 24%) and E4P/PEP derived amino acids (Tyr, Phe,  
101 Trp; 19.4%).

102 Focusing on the genus *Streptomyces*, which is renowned as being amongst the most talented  
103 of genera in terms of specialised metabolite production, it was found that 14 enzymatic steps  
104 from central metabolism (Glycolysis, TCA cycle, and amino acid metabolism) represented  
105 gene expansion events, such that they are overrepresented in this genus compared to the rest  
106 of the database. The following enzyme functions were found to be over-represented in the  
107 genus *Streptomyces* compared to the whole Actinobacterial phylum: phosphofructokinase  
108 (PFK), pyruvate kinase (PK), pyruvate phosphate dikinase (PPDK), malic enzyme (ME),  
109 pyruvate dehydrogenase complex E1 (PDHC E1), chorismate mutase, acetylglutamate  
110 kinase, diaminopimelate decarboxylase, aspartate aminotransferase, aspartate-  
111 semialdehyde dehydrogenase, serine hydroxymethyltransferase, glutamine synthetase,

112 arginosuccinate lyase and methionine synthetase (Table S1). To investigate how gene  
113 expansions in Actinobacteria are a potential prerequisite for increasing robustness in  
114 specialised metabolism capability, the two pyruvate kinases from *Streptomyces* were  
115 studied further due to their central role in carbon metabolism linking glycolysis,  
116 gluconeogenesis and the TCA cycle.

### 117 **Pyruvate kinases in *Streptomyces* arose by gene duplication**

118 PK catalyses the terminal step of glycolysis, converting one molecule of phosphoenolpyruvate  
119 to one molecule of pyruvate using ADP as the phosphor-acceptor resulting in the production  
120 of ATP. PK therefore plays a key role in linking glycolysis and the citric acid cycle. Moreover,  
121 it results in the formation of a direct precursor of Acetyl-CoA, which feeds directly into  
122 polyketide specialised metabolites. A high resolution species level phylogeny of the  
123 Actinobacteria was constructed using the  $\beta$ -subunit of RNA polymerase (RpoB)<sup>21,22</sup> which  
124 allowed the segregation of the phylum into three distinct phylogenetic branches: one  
125 composed of Streptomycineae and Catenulesporinae, a second including Propionibacterineae,  
126 Actinomycineae, Bifidobacteriales and Micrococcineae and the third one with  
127 Micromonosporineae, Glycomycineae, Corynebacterineae, Pseudonocardineae, Frankineae  
128 and Streptosporangineae (Fig. 1A).

129 A second phylogeny of the annotated PKs of the Actinobacteria was constructed. It indicated  
130 that there is a high level of congruence with the RpoB phylogeny as expected for a central  
131 metabolic enzyme (Fig. 1B). However, a bifurcating topology within the Streptomycineae  
132 family was observed, which contained the two genes encoding the putative PKs. This topology  
133 indicates that a gene duplication event occurred, which gave rise to two PKs within this group.  
134 Analysis of 286 *Streptomyces* species showed that 281 species have duplicate copies of PK,  
135 three species possess a single copy (*S. somaliensis*, *S. sp* NRRL F5135 and *S.*  
136 *scrabrisporus*), two species have three copies (*S. olindensis* and *S. sp.* Ach505) and a single  
137 species has four copies (*S. resistomycificus*). Interestingly, *S. sp* Ach505 and *S.*  
138 *resistomycificus* had one copy of *pyk* in each main branch of the PK tree and additional copies  
139 were found to be phylogenetically distant, suggesting that these copies were acquired through  
140 horizontal gene transfer (HGT). Overall, 92 % (302 of 327) Actinobacterial genomes outside  
141 of the genus *Streptomyces* encoded a single PK reinforcing the uniqueness of the duplication  
142 in this genus (Fig. 1B).

143 To determine if the duplicate PKs annotated in the *Streptomyces* genome have pyruvate  
144 kinase activity we used the two PKs from the model streptomycete, *S. coelicolor* A3(2), in  
145 genetic complementation tests of PK mutants of *Escherichia coli*. *E. coli* also has two PKs: a  
146 primary enzyme *pykF*, which is a Type I enzyme, regulated allosterically by fructose 1,6

147 biphosphate (FBP) and a distinct secondary Type II PK (*pykA*), regulated allosterically by  
148 AMP<sup>23</sup>. In *Streptomyces*, both PKs (Pyk1 and Pyk2) are Type I enzymes, homologous to PykF  
149 of *E. coli* (40.6 % and 41.3 % identity respectively). To test for functional complementation, *E.*  
150 *coli* mutants ( $\Delta$ *pykA*,  $\Delta$ *pykF* and a  $\Delta$ *pykA* $\Delta$ *pykF* double mutant, Table S3) were tested, along  
151 with the isogenic parental strain (*E. coli* BW25113) for their ability to grow under a range of  
152 physiological conditions (Fig. 1C). In LB (for which PK is dispensable for growth) and M9 plus  
153 acetate as the sole carbon source (where PK is also dispensable for growth), little difference  
154 was observed in the specific growth rate ( $h^{-1}$ ) of the strains (Data not shown). When the strains  
155 were grown in M9 plus glucose as the sole carbon source (where PK is essential for growth)  
156 the *E. coli*  $\Delta$ *pykA* $\Delta$ *pykF* double mutant was unable to grow, but could be genetically  
157 complemented with either *pyk1* (SCO2014) or *pyk2* (SCO5423) from *S. coelicolor*. The  
158 individual *E. coli*  $\Delta$ *pykA* and the  $\Delta$ *pykF* mutants had reduced specific growth rates (around  
159 50% of the isogenic parent strain) in M9 plus glucose. Genetic complementation with *pyk1* or  
160 *pyk2* from *S. coelicolor* was able to fully restore growth of an *E. coli*  $\Delta$ *pykF* mutant as expected.  
161 The *E. coli*  $\Delta$ *pykA* mutant could only be complemented with *pyk1* from *S. coelicolor*,  
162 suggesting a much more limited physiological role for *pykA* in *E. coli* (Fig. 1C). These data  
163 confirm that both *pyk1* and *pyk2* from *S. coelicolor* have retained PK activity following the  
164 duplication event but suggests that each has diverged and evolved different physiological  
165 roles.

166 Given that the PKs in *S. coelicolor* have diverged following duplication, we assessed the level  
167 of selection imposed on the PKs of *Streptomyces* by calculating the ratio of non-synonymous  
168 changes (dN) to synonymous changes (dS). Twenty PK sequences from 10 *Streptomyces*  
169 genomes were chosen to calculate the dN, dS and dN/dS values. The dN/dS ratio for pairs of  
170 *pyk* sequences for each of the genomes yielded dN/dS ratios ranging from 0.407 to 0.500,  
171 suggesting that PKs in *Streptomyces* are under strong purifying selection (Table. S2). Such  
172 high levels of purifying selection indicate that the duplication event in *Streptomyces* is likely to  
173 be ancient and is consistent with the PK tree topology (Fig. 1B).

#### 174 **The two pyruvate kinases in *Streptomyces* have distinct physiological roles**

175 To determine the roles played by the PKs in growth, development and antibiotic production, a  
176 series of mutant *S. coelicolor* strains was constructed and genetically complemented (Table  
177 S3, S4 & Fig. S2). Deletion mutants and transposon insertion mutants showed similar  
178 phenotypes (Fig.S2) and all subsequent work was carried out with transposon insertion  
179 mutants. Growth on nutrient agar showed no differences between the strains, except when an  
180 additional copy of *pyk1* was present in WT *in trans* (Fig. 2A). During culture on solid minimal  
181 medium with 1% glucose as carbon source, the strains showed no growth defects when



182 compared to wild-type (Fig. 2A). Interestingly, the *pyk1::Tn5062* mutant showed an increase  
183 in specialised metabolite production (Fig. 2A, 2C & 2D). The strain *pyk2::Tn5062* was  
184 marginally affected in growth and showed no over expression of specialised metabolites (Fig.  
185 2A). No changes in growth rate were observed in rich medium (YEME medium) for the WT,  
186 mutants or complemented strains (Fig. 2B). However, growth of the strains in this medium  
187 showed an increase in production of coelimycin<sup>24</sup> and undecylprodigiosin (RED) in the  
188 *pyk1::Tn5062* mutant (Fig. 2C) whereas a *pyk2::Tn5062* mutant showed reduced antibiotic  
189 yields (Fig. 2C & 2D). These data suggest that each PK isoenzyme plays a distinct  
190 physiological role in growth of *Streptomyces* and perturbation of central metabolism by their  
191 deletion or addition affects specialised metabolite biosynthesis. This would suggest that either  
192 the PKs are transcriptionally regulated to be expressed at key stages of the *Streptomyces*  
193 lifecycle or are regulated at the post-transcriptional/translational level. To test this hypothesis,  
194 we used semi-quantitative RT-PCR to examine the expression of the PKs from *S. coelicolor*  
195 throughout growth, relative to the multiplexed vegetative sigma factor *hrdB*. We found that  
196 both genes were constitutively expressed throughout growth (vegetative hyphae, aerial  
197 hyphae and during sporulation) relative to *hrdB* (Fig. 3A). To further characterise transcription,  
198 we used quantitative qRT-PCR at two time points during log and stationary phase during either  
199 glycolytic growth (glucose as sole carbon source) or gluconeogenic growth (Tween as sole  
200 carbon source) to analyse the expression levels of *pyk1*, *pyk2* and *hrdB*. Normalising  
201 expression to *hrdB*, there was an expected decrease in *pyk1* expression on Tween compared  
202 to glucose during the log and stationary phases of growth (3-fold and 8-fold respectively; Fig.  
203 3A and B). Comparison of *pyk1* and *pyk2* during the logarithmic growth phase indicated that  
204 *pyk2* had a 1.5-fold lower level of expression than in stationary phase versus log phase when  
205 grown on Tween as the sole carbon source, with all other conditions showing no significant  
206 changes in expression between *pyk1* and *pyk2* (Fig. 3Bi), suggesting that activity of PKs in  
207 *Streptomyces* is likely to be controlled at the post-translational level. Expression of *pyk2* also  
208 showed a decrease in expression on Tween compared to glucose during both phases, but the  
209 change was not significant (Fig 3Bii).

## 210 **Pyk1 and Pyk2 in *Streptomyces* have key substrate affinity differences and specific** 211 **effector molecules**

212 In order to understand the biochemical control of the two PKs of *S. coelicolor*, we purified each  
213 enzyme and studied their biochemical characteristics. Both Pyk1 and Pyk2 were activated by  
214 the effector molecule AMP and they both showed Michaelis-Menten type kinetics for the  
215 substrate ADP. For Pyk1,  $S_{0.5}$  was 4-fold lower in the presence of 1 mM AMP (0.59 mM down  
216 to 0.15 mM; Table 2), while  $V_{max}$  also increased 3.5-fold (from 21 U/mg to 73.3 U/mg). Pyk2  
217 showed a five-fold increase of  $V_{max}$  in the presence of 1 mM AMP (from 1.2 U/mg to 6.7 U/mg).



218  $S_{0.5}$  decreased three-fold (from 0.27 mM to 0.09 mM; Table 2, Fig. S2). There were profound  
219 differences in the PEP kinetics for both PKs, with both isoenzymes demonstrating Hill-type  
220 cooperative binding kinetics with AMP. In the presence of 1 mM AMP,  $V_{max}$  of Pyk1 increased  
221 five-fold (14.05 U/mg to 65.45 U/mg),  $S_{0.5}$  decreased more than three-fold (3.49 to 1.05 mM)  
222 and the Hill coefficient was approximately halved (from 3.7 to 1.8). For Pyk2 in the presence  
223 of 1 mM AMP,  $V_{max}$  was 9.1 U/mg compared to 0.5 U/mg without AMP, with  $S_{0.5}$  increased  
224 from 1.3 mM to 8.6 mM. Under these conditions the Hill coefficient increased from 1.45 to 7.1  
225 (Table 2). Further analysis demonstrated that Pyk1 has a much higher affinity for AMP ( $S_{0.5} =$   
226 0.01 mM), compared to Pyk2 ( $S_{0.5} = 3.8$  mM), with a concomitant increase in  $V_{max}$  (8.2 U/mg  
227 for Pyk1 compared to 1 U/mg for Pyk2, Fig S3C). The turnover rate constant ( $K_{cat}$ ) for Pyk1  
228 was >20 fold greater ( $4703 \text{ sec}^{-1}$ ) than that of Pyk2 ( $215 \text{ sec}^{-1}$ ; Table 2). Interestingly Pyk1  
229 was also shown to be highly stimulated by ribose-5-phosphate (Fig. S3). Intriguingly it is known  
230 that flux through the pentose phosphate pathway increases during entry into stationary phase  
231 in streptomycetes <sup>25</sup> suggesting that Pyk1 activity is stimulated during periods of starvation  
232 and during antibiotic production to rebalance reduced glycolytic flux and entry of substrates in  
233 to the TCA cycle.

234

## 235 Discussion

236 Metabolic robustness is a key biological adaptation to coping with environmental perturbation  
237 that enables an organism to persist in a given environment<sup>17</sup>. The ability of an organism to  
238 adapt to dynamic and competitive environments requires minimization of the effects of  
239 metabolic perturbations, which can be achieved through gene family expansion either  
240 following gene duplication or HGT. During nutrient stress, intracellular concentrations of key  
241 metabolic intermediates can fall which, when coupled with increasing demand during  
242 specialized metabolite biosynthesis, may produce metabolic conflict in cells. PK occupies a  
243 key position in carbon metabolism bridging glycolysis to the TCA cycle and plays a central role  
244 in the generation of ATP and precursors for the synthesis of specialised metabolite precursors  
245 (Acetyl-CoA, amino acids, organic acids etc)<sup>26</sup>. Duplication may promote adaptation and  
246 metabolic robustness through the evolution of altered substrate affinity and enzyme efficiency,  
247 which in turn enables key cellular process to proceed during times of perturbation, enabling  
248 specialised metabolite production and cellular growth to proceed, as we have demonstrated  
249 here.

250 Enzyme family expansion in central metabolism is widespread in the Actinobacteria with the  
251 Streptomycineae showing extensive enzyme family expansion in glycolysis. The duplication  
252 of pyruvate kinase is ancient, and has permitted subsequent divergence of the gene pair to  
253 evolve distinct physiological roles, where Pyk2 appears to function as a house-keeping PK,  
254 with a higher affinity for PEP (when AMP is low) and Pyk1 exhibits strong activation as AMP  
255 concentrations rise. An increased AMP concentration is a well-established starvation signal in  
256 bacteria<sup>27</sup> and may serve to increase flux through the terminal end of glycolysis during  
257 starvation to facilitate precursor supply for specialised metabolites. Moreover the PPP  
258 intermediate, ribose-5-phosphate, stimulates Pyk1 activity providing a physiological link  
259 between the PPP and the associated generation of NADPH which has established links to  
260 specialised metabolite synthesis, including those overproduced by strains engineered in this  
261 work<sup>25</sup>. Disruption of *pyk1* in *S. coelicolor* lead to increased levels of coelimycin and  
262 undecylprodigiosin when grown in rich medium (such as in industrial situations), but no  
263 significant increase in the yield of the polyketide antibiotic actinorhodin, which may suggest  
264 different metabolic control points affect biosynthesis of chemically similar specialised  
265 metabolites. We also demonstrate that the duplication of the primary metabolic enzyme, PK  
266 promotes metabolic robustness and influences the production of specialised metabolites.  
267 Understanding the evolution of central metabolism in conjunction with specialised metabolism  
268 can contribute to our fundamental understanding of the ability of Actinobacteria to produce a  
269 plethora of useful molecules and can help inform on novel approaches to metabolic  
270 engineering.

## 271 **Methods**

### 272 **Database generation and bioinformatics analysis**

273 The NCBI database (<http://www.ncbi.nlm.nih.gov/genbank/wgs>) was the source of  
274 actinobacterial genomes having a minimum coverage of 25x and less than 30 contigs per  
275 Mbp. To ensure a wide range of phylogeny, a selection of 614 species from 80 genera were  
276 included. Each genome was re-annotated using RAST<sup>19</sup> and the annotation files used to  
277 determine the frequency of each functional annotation. The mean of occurrences of each  
278 functional role was calculated per genus and examples which had a value equal or higher than  
279 the mean plus its standard deviation were defined as a 'gene expansion event'. Each  
280 candidate protein sequence was extracted from the actinobacterial genome database to form  
281 a BLASTP analysis working database. The sequences were then aligned with MUSCLE  
282 V3.8.31<sup>28</sup>, alignments were scrutinised using Jalview V2.10.1<sup>30</sup> to ensure that at least 25 %  
283 coverage with the query was achieved; if not sequences and expansions were discarded from  
284 the working database. Phylogenetic analysis of the alignments was conducted using  
285 MrBayes<sup>29</sup> V3.2.3 with trees visualised in FigTree  
286 V1.4.2(<http://tree.bio.ed.ac.uk/software/figtree/>). Sequences obtained from NCBI gene  
287 database and aligned with ClustalW algorithm in MEGA V6.06<sup>30</sup> and the synonymous (dS)  
288 and nonsynonymous (dN) changes were determined using the Distance Model Function with  
289 Nei-Gojobori<sup>31</sup> with Jukes-Cantor algorithm<sup>32</sup> Bootstrap.

### 290 **Growth and mutant construction in *Streptomyces***

291 Routine growth, spore generation and conjugation of *Streptomyces* strains were carried out  
292 according to Kieser *et al.*,<sup>33</sup> Antibiotic titres were determined according to Gottelt *et al* <sup>24</sup> for  
293 coelimycin and Kieser *et al.*,<sup>33</sup> for RED and ACT. *S. coelicolor* gene knock-out mutants ( $\Delta$ *pyk1*  
294 and  $\Delta$ *pyk2*) were constructed using PCR-targeted gene replacement with an apramycin  
295 resistance cassette (*acc(3)IV*) using the Redirect system<sup>34</sup> and the primers reported in Table  
296 S5. *S. coelicolor* transposon insertion mutants (*pyk1::Tn5062* and *pyk2::Tn5062*) were  
297 constructed using Tn5062 mutagenised cosmids as described in Fernández-Martínez *et al* <sup>35</sup>.  
298 Each cosmid was first verified by restriction analysis before being conjugated into  
299 *Streptomyces*. All strains were verified by PCR and sequencing of the respective products.

300

### 301 **Interspecies complementation**

302 *E. coli* single mutants were from the Keio collection<sup>36</sup> of *E. coli* BW25113<sup>36</sup> and the double  
303 mutant was constructed using Lambda Red recombination of *pykF* according to Datsenko and

304 Wanner<sup>37</sup>. Complementation studies used the *Streptomyces pyk1* and *pyk2* cloned into  
305 pET100\_TOPO (Invitrogen).

306 *E. coli* growth curves were carried out in 250 ml flasks with a working volume of 50 ml of either  
307 LB or M9 medium with 1% (w/v) glucose or 0.4% sodium acetate (w/v) as carbon source.  
308 Flasks were inoculated from an overnight culture (1% v/v) including the appropriate antibiotics  
309 and 1 mM IPTG to induce expression of the PKs. Growth was followed at OD<sub>600</sub> at 37°C with  
310 shaking at 250 rpm. The specific growth rate was determined from the semi-logarithmic plot  
311 of biomass concentration.

### 312 **Protein overexpression and purification**

313 The coding sequence of *pyk1* was codon optimised for *E coli* and amplified from the vector  
314 pEX-K4 using the primers in Table 2. The native version of *pyk2* was used to amplify the  
315 coding sequence using the primers in Table 2. Both coding sequences were cloned into the  
316 pET100 TOPO vector (Invitrogen) according to the manufacturer's instructions.  
317 Overexpression of *pyk1* was in *E. coli* Origami B on LB with 1 % (w/v) glucose at 30 °C until  
318 an OD<sub>600</sub> of 0.4 was reached and the expression was induced with 0.05 mM IPTG at 18°C  
319 overnight. Pyk2 overexpression was in *E. coli* Rosetta using Auto Induction medium  
320 (component per L: 10 g tryptone, 5 g yeast extract, 3.3 g (NH<sub>4</sub>)<sub>2</sub>SO<sub>4</sub>, 6.8 g KH<sub>2</sub>PO<sub>4</sub>, 7.1 g  
321 Na<sub>2</sub>HPO<sub>4</sub>, 0.5 g Glucose, 2.0 g α-Lactose, 0.15 g MgSO<sub>4</sub>) grown at 37°C for 2 h and then  
322 reduced to 18°C for overnight cultivation. Cells were disrupted by sonication. Pyk1 and Pyk2  
323 were purified by nickel affinity chromatography using HisTrap TM FF crude (GE Healthcare)  
324 with Binding Buffer (100 mM KH<sub>2</sub>PO<sub>4</sub> pH7.2, 10% glycerol (v/v), 100 mM NaCl, 20 mM  
325 imidazole). Tagged proteins were eluted with increasing imidazole concentration (Elution  
326 buffer: 100 mM KH<sub>2</sub>PO<sub>4</sub> pH7.2, 10% glycerol (v/v), 100 mM NaCl, 1 M imidazole). Fractions  
327 (1 ml) were collected and the highest concentrations of protein were pooled.

328 Kinetic characteristics of each pyruvate kinase were determined using purified protein  
329 samples according to the method of Bergmeyer et al.,<sup>38</sup> Assays to determine the enzyme  
330 kinetics for each PK under each condition were carried out in triplicate and analysed using  
331 GraphPad Prism using the Michaelis-Menten or Hill equation where appropriate.

### 332 **RNA extraction, semi-quantitative RT-PCR and qPCR analysis.**

333 Biomass of *S. coelicolor* came from liquid cultures and semi-quantitative RT-PCR was carried  
334 out according to the method of Clark and Hoskisson<sup>7</sup>. Total RNA was used as template for  
335 cDNA synthesis using a qPCRBIO cDNA synthesis Kit (PCR Biosystems). All cDNA samples  
336 were diluted to a concentration of 10 ng/μl with each qPCR reaction containing 10 ng of cDNA  
337 (1 μl) and were then mixed with 10 μl MasterMix (Kit 2x qPCRBIO SyGreen Mix Lo-ROX from

338 PCRBIOSYSTEMS), 2.5  $\mu$ l of each primer to a final reaction volume of 20  $\mu$ l using the Corbett  
339 Research 6000 (Qiagen).  
340

## 341 References

- 342 1. Bentley, S. D. *et al.* Complete genome sequence of the model actinomycete  
343 *Streptomyces coelicolor* A3(2). *Nature* **417**, 141–147 (2002).
- 344 2. Hiltner, J. K., Hunter, I. S. & Hoskisson, P. A. Tailoring specialized metabolite  
345 production in streptomyces. *Adv. Appl. Microbiol.* **91**, 237–255 (2015).
- 346 3. Wagner, A. Robustness and evolvability: a paradox resolved. *Proceedings of the*  
347 *Royal Society B: Biological Sciences* **275**, 91–100 (2008).
- 348 4. Wagner, A. Gene duplications, robustness and evolutionary innovations. *Bioessays*  
349 **30**, 367–373 (2008).
- 350 5. Treangen, T. J. & Rocha, E. P. C. Horizontal transfer, not duplication, drives the  
351 expansion of protein families in prokaryotes. *PLoS Genet* **7**, e1001284 (2011).
- 352 6. McLoughlin, S. Y. & Copley, S. D. A compromise required by gene sharing enables  
353 survival: Implications for evolution of new enzyme activities. *Proc. Natl. Acad. Sci.*  
354 *U.S.A.* **105**, 13497–13502 (2008).
- 355 7. Clark, L. C. & Hoskisson, P. A. Duplication and evolution of devA-like genes in  
356 streptomyces has resulted in distinct developmental roles. *PLoS ONE* **6**, e25049–  
357 (2011).
- 358 8. Clark, L. C. *et al.* Mammalian cell entry genes in *Streptomyces* may provide clues to  
359 the evolution of bacterial virulence. *Sci Rep* **3**, 1109 (2013).
- 360 9. Challis, G. L. & Hopwood, D. A. Synergy and contingency as driving forces for the  
361 evolution of multiple secondary metabolite production by *Streptomyces* species. *Proc.*  
362 *Natl. Acad. Sci. U.S.A.* **100** Suppl 2, 14555–14561 (2003).
- 363 10. Chater, K. F., Biró, S., Lee, K. J., Palmer, T. & Schrempf, H. The complex  
364 extracellular biology of *Streptomyces*. *FEMS Microbiology Reviews* **34**, 171–198  
365 (2010).
- 366 11. Kim, J. & Copley, S. D. Why metabolic enzymes are essential or nonessential for  
367 growth of *Escherichia coli* K12 on glucose. *Biochemistry* **46**, 12501–12511 (2007).
- 368 12. Teichmann, S. A. & Babu, M. M. Gene regulatory network growth by duplication.  
369 *Nature Genetics* **36**, 492–496. (2004).
- 370 13. Girard, G. *et al.* A novel taxonomic marker that discriminates between morphologically  
371 complex actinomycetes. *Open Biology* **3**, (2013).
- 372 14. Chater, K. F. & Chandra, G. The evolution of development in *Streptomyces* analysed  
373 by genome comparisons. *FEMS Microbiology Reviews* **30**, 651–672 (2006).
- 374 15. Tokovenko, B., Rebets, Y. & Luzhetskyy, A. Automating Assessment of the  
375 Undiscovered Biosynthetic Potential of Actinobacteria. *BioRxiv* 036087 (2016).  
376 doi:10.1101/036087
- 377 16. Bibb, M. J. Regulation of secondary metabolism in streptomycetes. *Curr. Opin.*  
378 *Microbiol.* **8**, 208–215 (2005).
- 379 17. Lenski, R. E., Barrick, J. E. & Ofria, C. Balancing robustness and evolvability. *Plos*  
380 *Biol* **4**, e428 (2006).
- 381 18. Nowak, M. A., Boerlijst, M. C., Cooke, J. & Smith, J. M. Evolution of genetic  
382 redundancy. *Nature* **388**, 167–171 (1997).
- 383 19. Aziz, R. K. *et al.* The RAST Server: rapid annotations using subsystems technology.  
384 *BMC Genomics* **9**, 75 (2008).
- 385 20. Cruz-Morales, P. *et al.* Phylogenomic analysis of natural products biosynthetic gene  
386 clusters allows discovery of arseno-organic metabolites in model streptomycetes.  
387 *Genome Biology and Evolution* **8**, 1906–1916 (2016).
- 388 21. Case, R. J. *et al.* Use of 16S rRNA and rpoB genes as molecular markers for  
389 microbial ecology studies. **73**, 278–288 (2007).
- 390 22. Kämpfer, P. & Glaeser, S. P. Prokaryotic taxonomy in the sequencing era--the  
391 polyphasic approach revisited. **14**, 291–317 (2012).
- 392 23. Muñoz, E. & Ponce, E. Pyruvate kinase: current status of regulatory and functional  
393 properties. *Comparative Biochemistry and Physiology Part B: Biochemistry and*  
394 *Molecular Biology* **135**, 197–218 (2003).



- 395 24. Gomez-Escribano, J. P. *et al.* Structure and biosynthesis of the unusual polyketide  
396 alkaloid coelimycin P1, a metabolic product of the cpk gene cluster of *Streptomyces*  
397 *coelicolor* M145. *Chem. Sci.* **3**, 2716 (2012).
- 398 25. Obanye, A. I. C., Hobbs, G., Gardner, D. C. J. & Oliver, S. G. Correlation between  
399 carbon flux through the pentose phosphate pathway and production of the antibiotic  
400 methylenomycin in *Streptomyces coelicolor* A3(2). *Microbiology* **142**, 133–137 (1996).
- 401 26. Hodgson, D. A. Primary metabolism and its control in streptomycetes: A most unusual  
402 group of bacteria. *Adv. Microb. Physiol.* **42**, 47–238 (2000).
- 403 27. Brauer, M. J. *et al.* Conservation of the metabolomic response to starvation across  
404 two divergent microbes. *Proceedings of the National Academy of Sciences* **103**,  
405 19302–19307 (2006).
- 406 28. Edgar, R. C. MUSCLE: a multiple sequence alignment method with reduced time and  
407 space complexity. *BMC Bioinformatics* **5**, 113 (2004).
- 408 29. Ronquist, F. *et al.* MrBayes 3.2: efficient Bayesian phylogenetic inference and model  
409 choice across a large model space. *Systematic Biology* **61**, 539–542 (2012).
- 410 30. Kumar, S., Tamura, K. & Nei, M. MEGA3: Integrated software for Molecular  
411 Evolutionary Genetics Analysis and sequence alignment. *Brief. Bioinformatics* **5**, 150–  
412 163 (2004).
- 413 31. Nei, M. & Gojobori, T. Simple methods for estimating the numbers of synonymous  
414 and nonsynonymous nucleotide substitutions. *Molecular Biology and Evolution* **3**,  
415 418–426 (1986).
- 416 32. Jukes, T. H., & Cantor, C. R. Evolution of protein molecules. in *Mammalian Protein*  
417 *Metabolism*. Ed Munro, H. N. (1990).
- 418 33. Kieser, T., Bibb, M. J., Buttner, M. J., Chater, K. F. & Hopwood, D. A. *Practical*  
419 *Streptomyces Genetics*. (John Innes Foundation, 2000).
- 420 34. Gust, B., Challis, G. L., Fowler, K., Kieser, T. & Chater, K. F. PCR-targeted  
421 *Streptomyces* gene replacement identifies a protein domain needed for biosynthesis  
422 of the sesquiterpene soil odor geosmin. *Proceedings of the National Academy of*  
423 *Sciences* **100**, 1541–1546 (2003).
- 424 35. Fernández-Martínez, L. T. *et al.* A transposon insertion single-gene knockout library  
425 and new ordered cosmid library for the model organism *Streptomyces coelicolor*  
426 A3(2). *Antonie Van Leeuwenhoek* **99**, 515–522 (2011).
- 427 36. Baba, T. *et al.* Construction of *Escherichia coli* K-12 in-frame, single-gene knockout  
428 mutants: the Keio collection. *Molecular Systems Biology* **2**, (2006).
- 429 37. Datsenko, K. A. & Wanner, B. L. One-step inactivation of chromosomal genes in  
430 *Escherichia coli* K-12 using PCR products. *Proceedings of the National Academy of*  
431 *Sciences* **97**, 6640–6645 (2000).
- 432 38. Bergmeyer, H. U., Gawehn, K. & Grassl, M. Enzymatic assay of Pyruvate kinase.  
433 *Methods of enzymatic analysis* **1**, 509–510 (1974).
- 434
- 435

436



437 **Acknowledgements**

438 We would like to thank the Scottish Universities Life Science Alliance (SULSA) for BioSkape  
439 PhD funding to JKS, The Mac Robertson Travelling Scholarship awarded to JKS, and the  
440 Natural Environment Research Council for Grant NE/M001415/1 to PAH. We would also like  
441 to thank Professor Ian Henderson and Dr Faye Morris (University of Birmingham) for the gift  
442 of the *E. coli* Keio collection mutants and Professor David Hodgson for helpful discussions.

443 **Legends.**

444 **Table 1: Percentage of primary metabolic pathway gene expansion per suborder and**  
445 **pathways of central carbon metabolism.** (highest percentage of gene expansion for each  
446 pathway is highlighted in yellow). **Legend:** GLY = glycolysis, GNG = gluconeogenesis, PPP =  
447 pentose phosphate pathway, TCA = tricarboxylic acid cycle, AA = amino acids, 2OG = 2-oxo-  
448 glutarate, PYR = pyruvate, OAA = oxaloacetate, 3PGA = 3-phosphoglycerate, R5P = ribose-  
449 5-phosphate, E4P = erythrose-4-phosphate, PEP = phosphoenolpyruvate, NE = no  
450 expansion.

451 **Table 2:** Kinetic characteristics of Pyk1 and Pyk2 for the substrates ADP, PEP and the  
452 activator AMP

453 **Figure Legends**

454 **Figure 1:** Phylogenetic Analysis of RpoB and PK across 80 different actinobacterial genera  
455 grouped and colour coded by family **(A)** Phylogenetic tree based on RpoB protein sequences  
456 **(B)** Phylogenetic tree based on pyruvate kinase protein sequences. Grey circles indicate the  
457 *Streptomycineae* **(C)** Specific growth rate of *E. coli* pyruvate kinase mutants ( $\Delta pykA$ ,  $\Delta pykF$   
458  $\Delta pykA\Delta pykF$ ) and the complemented mutants with either *pyk1* or *pyk2* from *S. coelicolor* on  
459 M9 Medium with glucose as carbon source. \*  $p$ -value  $\leq 0.05$  \*\*  $p$ -value  $\leq 0.01$  \*\*\*  $p$ -value  $\leq$   
460 0.001

461 **Figure 2:** Phenotypic characterisation of pyruvate kinase mutants **(A)** Wild-Type and *pyk1* &  
462 *pyk2* transposon mutants of *S. coelicolor* grown on nutrient agar and minimal medium with  
463 glucose, with complemented strains with either *pyk1* or *pyk2* *in trans* and WT strains with  
464 additional copies of *pyk1* or *pyk2* **(B)** Growth curve of *S. coelicolor* WT, pyruvate kinase  
465 mutants and complemented strains in liquid YEME medium **(C)** coelimycin production yield  
466 (absorption unit/mg biomass) and **(D)** undecylprodigiosin (RED) yield during growth in YEME  
467 medium.

468 WT (●) and pyruvate kinase mutants (*pyk1* ■; *pyk2* ▼) and complemented strains (*pyk1*  
469 complemented ▲; *pyk2* complemented ◆).

470 **Figure 3:** **(A)** Semi-quantitative RT-PCR of expression of *pyk1*, *pyk2* and *hrdB* throughout the  
471 lifecycle of *Streptomyces coelicolor*. **(B)** Fold change expression of *pyk1* and *pyk2* normalised  
472 to *hrdB* expression from three biological replicates measuring expression levels by qPCR on  
473 growth in minimal medium with either glucose or tween as carbon source during log or  
474 stationary phase comparing expression (i) stationary phase versus log phase and (ii) Tween  
475 versus glucose. \*  $p$ -value  $\leq 0.05$

476 **Table 1: Percentage of metabolic pathway gene expansion per suborder and pathway from central carbon metabolism.** (highest  
 477 percentage for each pathway is highlighted in yellow). **Legend:** GLY = glycolysis, GNG = gluconeogenesis, PPP = pentose phosphate  
 478 pathway, TCA = tricarboxylic acid cycle, AA = amino acids, 2OG = 2-oxo-glutarate, PYR = pyruvate, OAA = oxaloacetate, 3PGA = 3-  
 479 phosphoglycerate, R5P = ribose-5-phosphate, E4P = erythrose-4-phosphate, PEP = phosphoenolpyruvate, NE = no expansion.

480

| Suborder/Pathway                          |               |                | GLY  | GNG  | PPP  | TCA  | AA<br>derived<br>from<br>2OG | AA<br>derived<br>from<br>PYR | AA<br>derived<br>from<br>OAA | AA<br>derived<br>from<br>3PGA | AA<br>derived<br>from<br>R5P | AA<br>derived<br>from<br>E4P/PEP |
|-------------------------------------------|---------------|----------------|------|------|------|------|------------------------------|------------------------------|------------------------------|-------------------------------|------------------------------|----------------------------------|
| <b>Enzymes in the<br/>minimum pathway</b> |               |                | 10   | 5    | 7    | 17   | 13                           | 10                           | 18                           | 7                             | 10                           | 18                               |
|                                           | <b>Genera</b> | <b>Species</b> |      |      |      |      |                              |                              |                              |                               |                              |                                  |
| <b>Streptomycineae</b>                    | 3             | 303            | 23.3 | 8.3  | 4.8  | 8.3  | 11.9                         | 11.1                         | 10.5                         | 16.7                          | NE                           | 14.0                             |
| <b>Catenulisporineae</b>                  | 2             | 3              | 25.0 | 12.5 | 42.9 | 25.0 | 21.4                         | 16.7                         | 13.2                         | 25.0                          | 10.0                         | 15.8                             |
| <b>Streptosporangineae</b>                | 9             | 28             | 6.7  | 11.1 | 3.2  | 13.2 | 10.3                         | 17.3                         | 11.7                         | 11.1                          | 3.3                          | 12.3                             |
| <b>Frankineae</b>                         | 3             | 11             | 6.7  | NE   | 23.8 | NE   | 11.9                         | NE                           | 8.8                          | 11.1                          | 10.0                         | 8.8                              |
| <b>Pseudonocardineae</b>                  | 16            | 57             | 10.6 | 25.0 | 17.0 | 28.3 | 20.1                         | 31.3                         | 20.7                         | 24.0                          | 17.5                         | 19.4                             |
| <b>Corynebacterineae</b>                  | 8             | 62             | 7.5  | 9.4  | 5.4  | 10.2 | 8.7                          | 8.3                          | 6.6                          | 6.3                           | 7.5                          | 5.3                              |
| <b>Micromonosporineae</b>                 | 9             | 19             | 20.0 | 13.9 | 15.9 | 16.7 | 14.3                         | 18.5                         | 21.1                         | 13.0                          | 23.3                         | 13.5                             |
| <b>Glycomycineae</b>                      | 1             | 3              | NE   | 0.0  | 14.3 | NE   | 7.1                          | NE                           | 5.3                          | NE                            | NE                           | NE                               |
| <b>Micrococcineae</b>                     | 17            | 74             | 6.5  | 5.9  | 5.0  | 5.5  | 4.6                          | 2.6                          | 8.4                          | 6.9                           | 3.5                          | 4.0                              |
| <b>Bifidobacteriales</b>                  | 1             | 3              | NE   | NE   | 14.3 | NE   | 0.0                          | 11.1                         | 21.1                         | NE                            | 10.0                         | NE                               |
| <b>Actinomycineae</b>                     | 2             | 26             | NE   | NE   | 7.1  | NE   | 0.0                          | NE                           | NE                           | NE                            | NE                           | 5.3                              |
| <b>Kineosporineae</b>                     | 1             | 1              | 20.0 | NE   | 28.6 | NE   | 14.3                         | NE                           | 21.1                         | NE                            | 20.0                         | 5.3                              |
| <b>Propionibacterineae</b>                | 8             | 24             | 13.8 | 12.5 | 7.1  | 9.4  | 7.1                          | 18.1                         | 11.8                         | 12.5                          | 7.5                          | 4.6                              |

481 **Table 2:** Kinetic characteristics of Pyk1 and Pyk2 with ADP, PEP and AMP.

482

| Substrate         | Parameter                                             | no AMP |      | 1 mM AMP |      |
|-------------------|-------------------------------------------------------|--------|------|----------|------|
|                   |                                                       | Pyk1   | Pyk2 | Pyk1     | Pyk2 |
| 5 mM PEP<br>ADP   | $V_{max}$ (U/mg)                                      | 21.0   | 1.2  | 73.3     | 6.7  |
|                   | $S_{0.5}$ (mM)                                        | 0.6    | 0.3  | 0.2      | 0.1  |
|                   | $k_{cat}$ (sec <sup>-1</sup> )                        | 941    | 39   | 4703     | 215  |
|                   | $k_{cat}/K_m$ (mM <sup>-1</sup> s <sup>-1</sup> )     | 1594   | 145  | 31359    | 2388 |
| 1.5 mM ADP<br>PEP | $V_{max}$ (U/mg)                                      | 14.1   | 0.5  | 65.5     | 9.1  |
|                   | $S_{0.5}$ (mM)                                        | 3.5    | 1.3  | 1.1      | 8.6  |
|                   | Hill Coefficient                                      | 3.7    | 1.5  | 1.8      | 7.1  |
|                   | $k_{cat}$ (sec <sup>-1</sup> )                        | 350    | 18   | 4200     | 336  |
|                   | $k_{cat}/S_{0.5}$ (mM <sup>-1</sup> s <sup>-1</sup> ) | 100    | 14   | 4000     | 39   |
| AMP               | $V_{max}$ (U/mg)                                      | 8.2    | 1    |          |      |
|                   | $S_{0.5}$ (mM)                                        | 0.01   | 3.8  |          |      |
|                   | $k_{cat}$ (sec <sup>-1</sup> )                        | 423.7  | 42.0 |          |      |
|                   | $K_{cat}/S_{0.5}$ (mM <sup>-1</sup> s <sup>-1</sup> ) | 42373  | 11   |          |      |

483

484

485

486

487

488

489

490

491

492

493

494

495

496

497

498

499 **Fig 1.**

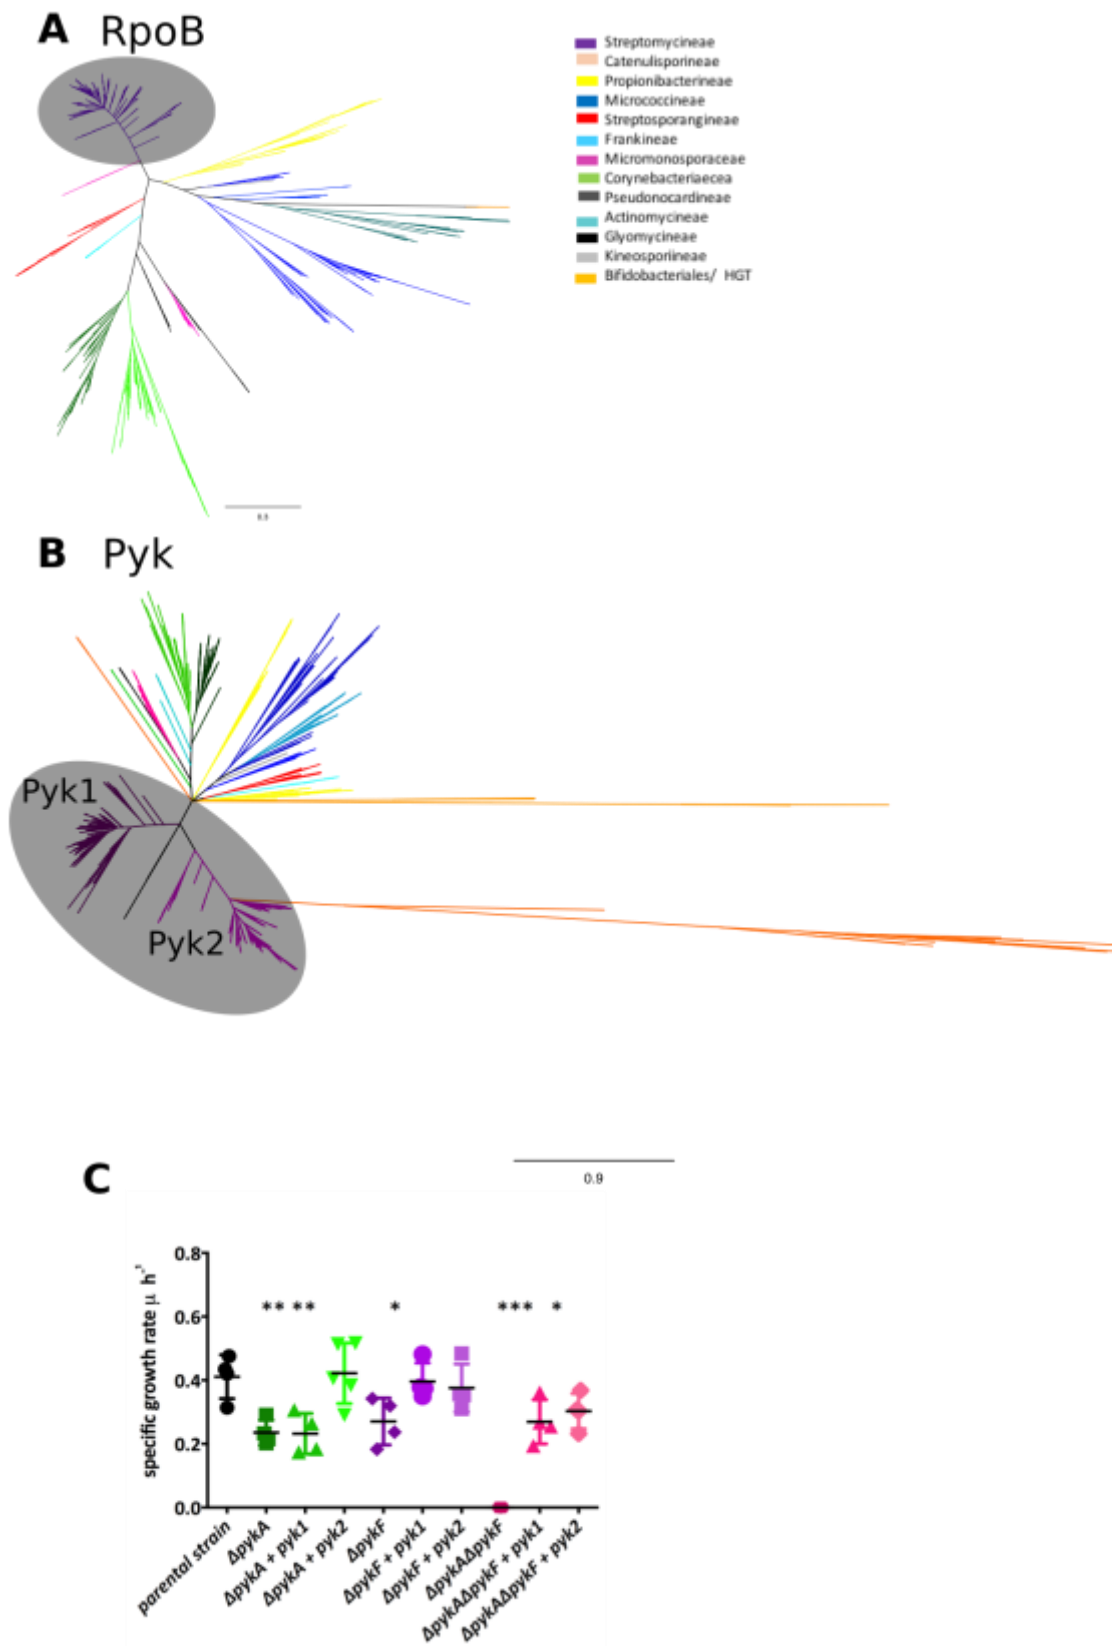

500

501

502

503 **Fig 2**

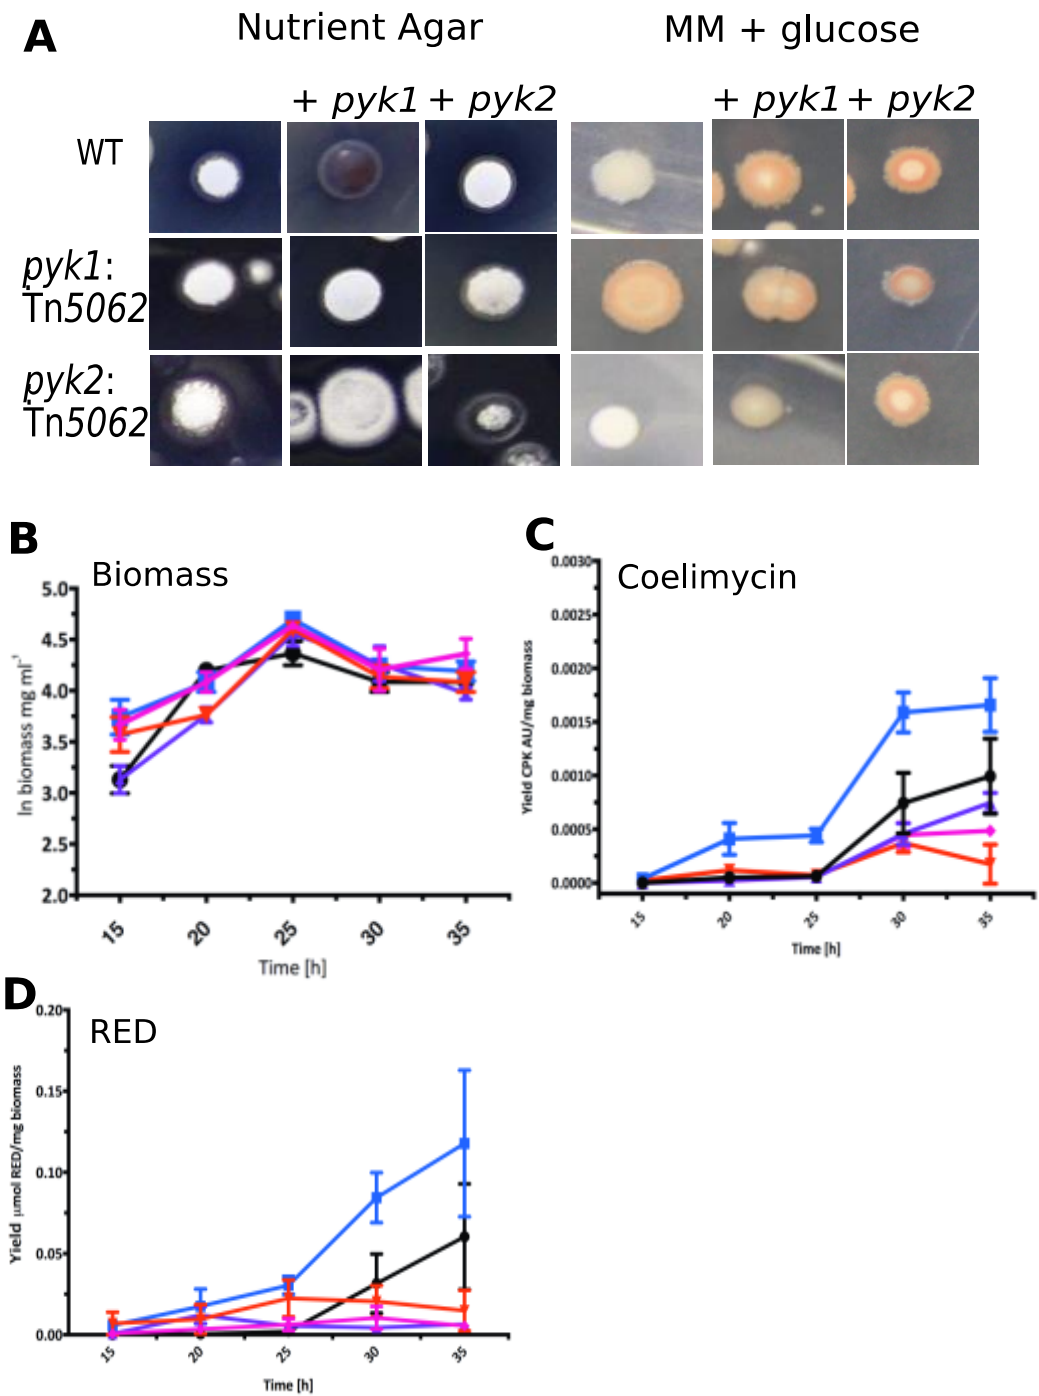

504

505

506 Fig 3.

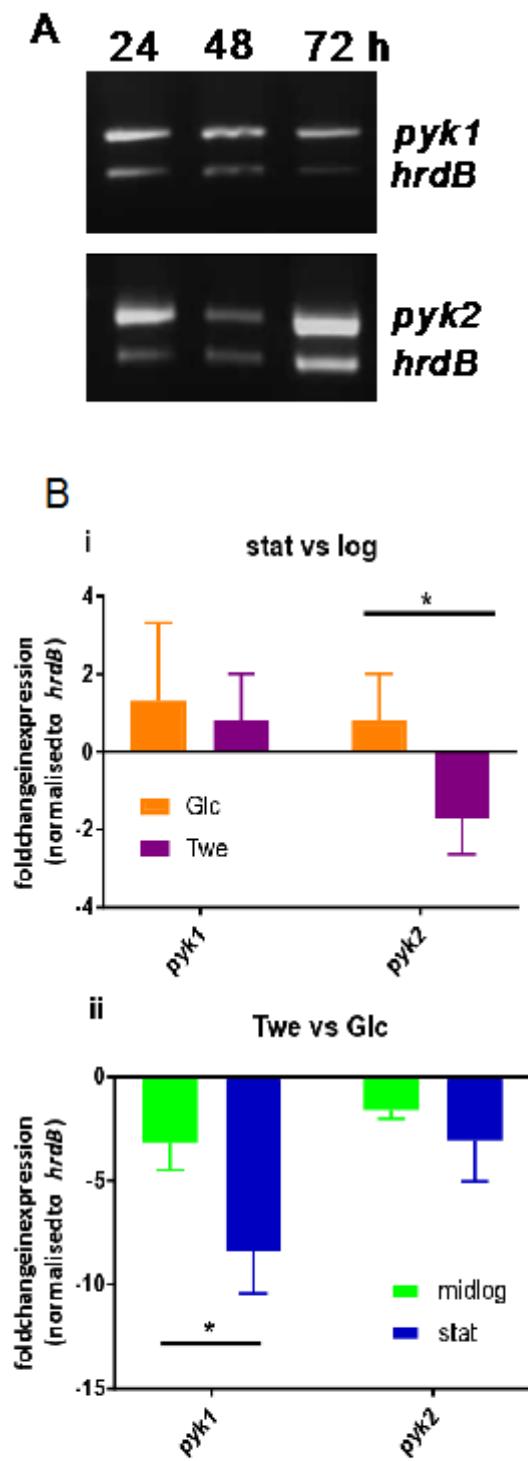

507
